# Supplementary material for: Carbon Monoxide Production During Bio-Waste Composting Under Different Temperature and Aeration Regimes
Source: Preprints.org preprint supplement (doi:10.20944/preprints202305.0741.v1), 2023-05-10
Supplement: Supplementary file 1 [file supplementary]

Table S1. Properties of composts from different temperature variants ± st. dev.; d.m. – dry matter

| **Process T, °C** | **Aeration rate, L‧h-1** | **pH** | **EC, mS‧cm-1** | **TOC, % d.m.** | **TN, % d.m.** | **C/N** | **Water content, %** | **LOI, % d.m.** | **NH4-N,**  **mg‧kg d.m.-1** | **NO3-N, mg‧kg d.m. -1** | **AT4,**  **mg O2‧g d.m. -1** |
| --- | --- | --- | --- | --- | --- | --- | --- | --- | --- | --- | --- |
| 35 | 2.7 | 8.43 ± 0.07 | 2.65 ± 0.02 | 33.46 ± 0.01 | 1.75 ± 0.00 | 19 | 56.20 ± 1.09 | 63.51 ± 0.25 | 12.90 ± 0.48 | 27.97 ± 13.08 | 13.0 ± 0.3 |
| 3.4 | 8.41 ± 0.02 | 2.63 ± 0.03 | 33.19 ± 0.09 | 1.81 ± 0.02 | 18 | 55.31 ± 1.58 | 63.04 ± 0.07 | 14.32 ± 0.32 | 38.37 ± 18.19 | 12.9 ± 0.1 |
| 4.8 | 8.51 ± 0.03 | 2.67 ± 0.04 | 32.62 ± 0.03 | 1.75 ± 0.01 | 19 | 51.55 ± 0.03 | 62.39 ± 0.22 | 11.24 ± 0.44 | 25.26 ± 7.14 | 12.9 ± 0.9 |
| 7.8 | 8.60 ± 0.05 | 2.69 ± 0.01 | 32.56 ± 0.05 | 1.85 ± 0.01 | 18 | 54.02 ± 4.47 | 61.09 ± 0.25 | 9.67 ± 0.46 | 19.46 ± 7.53 | 12.7 ± 0.1 |
| 45 | 2.7 | 5.26 ± 0.02 | 4.95 ± 0.03 | 35.30 ± 0.15 | 1.65 ± 0.00 | 20 | 56.23 ± 0.05 | 63.18 ± 0.52 | 1461.07 ± 0.16 | 74.54 ± 10.49 | 71.9 ± 3.1 |
| 3.4 | 7.38 ± 0.03 | 4.55± 0.03 | 32.37 ± 1.03 | 1.75 ± 0.03 | 19 | 56.06 ± 0.30 | 62.30 ± 0.19 | 821.07 ± 39.14 | 57.63 ± 13.21 | 33.7 ± 3.7 |
| 4.8 | 7.42 ± 0.02 | 4.04± 0.02 | 33.81 ± 0.47 | 1.83 ± 0.06 | 17 | 51.57 ± 1.02 | 60.58 ± 0.02 | 649.90 ± 11.83 | 80.99 ± 4.68 | 40.7 ± 1.1 |
| 7.8 | 7.46 ± 0.01 | 3.52± 0.01 | 33.17 ± 0.22 | 1.77 ± 0.03 | 18 | 49.91 ± 0.98 | 61.14 ± 0.19 | 457.19 ± 11.43 | 47.31 ± 11.57 | 37.5 ± 3.1 |
| 55 | 2.7 | 8.30 ± 0.01 | 2.49 ± 0.01 | 32.03 ± 0.38 | 1.71 ± 0.03 | 19 | 47.54 ± 0.99 | 60.84 ± 0.46 | 390.86 ± 12.12 | 28.00 ± 8.89 | 36.0 ± 0.8 |
| 3.4 | 8.29 ± 0.01 | 2.39 ± 0.01 | 31.69 ± 0.01 | 1.85 ± 0.05 | 17 | 41.45 ± 1.02 | 58.42 ± 1.38 | 137.69 ± 5.44 | 86.58 ± 3.99 | 16.0 ± 0.8 |
| 4.8 | 8.25 ± 0.03 | 2.28 ± 0.03 | 31.33 ± 0.71 | 1.73 ± 0.00 | 18 | 38.78 ± 0.78 | 60.20 ± 0.16 | 140.44 ± 1.04 | 24.02 ± 7.63 | 9.8 ± 0.6 |
| 7.8 | 8.29 ± 0.01 | 2.39 ± 0.03 | 30.21 ± 0.25 | 1.86 ± 0.02 | 16 | 38.55 ± 0.68 | 59.54 ± 0.03 | 72.15 ± 3.69 | 21.25 ± 3.80 | 13.7 ± 1.1 |
| 65 | 2.7 | 7.53 ± 0.08 | 2.84 ± 0.01 | 36.00 ± 0.21 | 1.94 ± 0.04 | 19 | 59.30 ± 1.44 | 66.84 ± 0.47 | 265.36 ± 9.38 | 10.07 ± 2.78 | 24.6 ± 0.1 |
| 3.4 | 7.53 ± 0.05 | 2.88 ± 0.00 | 35.94 ± 0.10 | 2.02 ± 0.02 | 18 | 50.74 ± 1.16 | 67.69 ± 0.17 | 194.42 ± 6.45 | 3.25 ± 00 | 20.7 ± 0.4 |
| 4.8 | 7.74 ± 0.01 | 2.56 ± 0.04 | 35.81 ± 1.16 | 1.87 ± 0.07 | 19 | 51.34 ± 0.11 | 67.57 ± 0.92 | 95.25 ± 1.31 | 25.17 ± 2.47 | 18.6 ± 1.1 |
| 7.8 | 7.81 ± 0.02 | 2.55 ± 0.03 | 35.17 ± 0.14 | 2.02 ± 0.06 | 17 | 55.33 ± 0.76 | 66.62 ± 0.38 | 114.77 ± 0.00 | 18.23 ± 5.22 | 32.1 ± 0.7 |
